# Supplementary material for: Tenecteplase thrombolytic therapy for acute ischaemic stroke in China: a real-world, multicentre, retrospective, controlled study
Source: HighWire-hosted journal article supplement (doi:10.1136/svn-2024-003381), 2024-11-13
Supplement: svn-2024-003381supp001_data_supplement.pdf [file svn-2024-003381supp001_data_supplement.pdf]

Supplementary Table 1. Data sources

|                                                                                                | Unmatched groups |                 |       | PSM groups      |                 |       |
|------------------------------------------------------------------------------------------------|------------------|-----------------|-------|-----------------|-----------------|-------|
| Center                                                                                         | TNK              | rt-PA           | Total | TNK             | rt-PA           | Total |
| Keshiketeng Banner<br>Traditional Chinese Medicine<br>Mongolian Medicine<br>Hospitalorem Ipsum | 489<br>(43.94%)  | 57 (2.42%)      | 546   | 489<br>(43.97%) | 51 (4.58%)      | 540   |
| Yantai Affiliated Hospital of<br>Binzhou Medical University                                    | 168<br>(15.09%)  | 188 (7.97%)     | 356   | 168<br>(15.09%) | 77 (6.92%)      | 245   |
| Nanshi Hospital of Nanyang                                                                     | 96 (8.63%)       | 479<br>(20.30%) | 575   | 96 (8.63%)      | 288<br>(25.88%) | 384   |
| Shenyang Fifth People's<br>Hospital                                                            | 95 (8.54%)       | 0 (0%)          | 95    | 95 (8.54%)      | 0 (0%)          | 95    |
| Fushun General Hospital of<br>Mining Bureau                                                    | 61 (5.48%)       | 9 (0.38%)       | 70    | 61 (5.48%)      | 3 (0.27%)       | 64    |
| The First Affiliated Hospital<br>of Ningbo University                                          | 31 (2.79%)       | 381<br>(16.14%) | 412   | 31 (2.79%)      | 196<br>(17.61%) | 227   |
| Jilin Liuhe Hospital                                                                           | 34 (3.05%)       | 0 (0%)          | 34    | 34 (3.05%)      | 0 (0%)          | 34    |
|                                                                                                |                  |                 |       |                 |                 |       |
| SHANGHAI                                                                                       |                  |                 |       |                 |                 |       |
| Huashan Hospital, Fudan<br>University                                                          | 5 (0.45%)        | 436<br>(18.47%) | 441   | 5 (0.45%)       | 168<br>(15.09%) | 173   |
| Shanghai Pudong Gongli<br>Hospital                                                             | 33 (2.96%)       | 40 (1.69%)      | 73    | 33 (2.96%)      | 23 (2.07%)      | 56    |
| Shanghai East Hospital<br>(South Branch)                                                       | 28 (2.52%)       | 77 (3.26%)      | 105   | 28 (2.52%)      | 34 (3.05%)      | 62    |
| Shanghai East Hospital                                                                         | 24 (2.16%)       | 62 (2.63%)      | 86    | 24 (2.16%)      | 35 (3.05%)      | 59    |
| Shanghai Putuo Liqun<br>Hospital                                                               | 18 (1.62%)       | 31 (1.31%)      | 49    | 18 (1.62%)      | 6 (0.54%)       | 24    |
| Shanghai Fourth People's<br>Hospital                                                           | 10 (0.9%)        | 115 (4.87%)     | 125   | 10 (0.9%)       | 59 (5.3%)       | 69    |
| Shanghai 10th People's<br>Hospital                                                             | 9 (0.81%)        | 456<br>(19.32%) | 465   | 9 (0.9%)        | 159<br>(14.29%) | 168   |
| Ruijin Hospital Luwan Branch                                                                   | 9 (0.81%)        | 0 (0%)          | 9     | 9 (0.81%)       | 0 (0%)          | 9     |
| Shanghai Ninth People's<br>Hospital Huangpu Branch                                             | 2 (0.18%)        | 17 (0.72%)      | 19    | 2 (0.18%)       | 8 (0.72%)       | 10    |
| Shanghai Deji Hospital                                                                         | 1 (0.09%)        | 9 (0.38%)       | 10    | 1 (0.09%)       | 3 (0.27%)       | 4     |
| Shanghai Tianyou Hospital                                                                      | 0 (0%)           | 3 (0.13%)       | 3     | 0 (0%)          | 3 (0.27%)       | 3     |
| Total                                                                                          | 1113             | 2360            | 3473  | 1113            | 1113            | 2226  |

**Supplementary Table 2. Details of missing values and imputation status**

| <b>Characteristic</b>                     | <b>TNK (N=1113)</b><br>Missing values, n (%) | <b>Multiple<br/>imputation</b> | <b>rt-PA (N=2360)</b><br>Missing values, n (%) | <b>Multiple<br/>imputation</b> |
|-------------------------------------------|----------------------------------------------|--------------------------------|------------------------------------------------|--------------------------------|
| <b>Demographics</b>                       |                                              |                                |                                                |                                |
| Age                                       | 3 (0.27%)                                    | Yes                            | 1 (0.042%)                                     | Yes                            |
| Sex                                       | 0 (0.00%)                                    | No                             | 0 (0.00%)                                      | No                             |
| <b>Risk factors</b>                       |                                              |                                |                                                |                                |
| smoking                                   | 4 (0.36%)                                    | Yes                            | 56 (2.37%)                                     | Yes                            |
| <b>Medical history</b>                    |                                              |                                |                                                |                                |
| History of hypertension                   | 0 (0.00%)                                    | No                             | 0 (0.00%)                                      | No                             |
| History of diabetes                       | 0 (0.00%)                                    | No                             | 2 (0.085%)                                     | Yes                            |
| History of hyperlipidimia                 | 0 (0.00%)                                    | No                             | 2 (0.085%)                                     | Yes                            |
| History of atrial fibrillation            | 0 (0.00%)                                    | No                             | 5 (0.212%)                                     | Yes                            |
| History of coronal heart disease          | 0 (0.00%)                                    | No                             | 93 (3.94%)                                     | Yes                            |
| History of heart failure                  | 0 (0.00%)                                    | No                             | 420 (17.80%)                                   | Yes                            |
| History of ischemic stroke/TIA            | 0 (0.00%)                                    | No                             | 59 (2.5%)                                      | Yes                            |
| <b>Concomitant medication</b>             |                                              |                                |                                                |                                |
| Antiplatelets                             | 0 (0.00%)                                    | No                             | 3 (0.13%)                                      | Yes                            |
| Anticoagulants                            | 0 (0.00%)                                    | No                             | 5 (0.212%)                                     | Yes                            |
| <b>Pre-stroke disability</b>              |                                              |                                |                                                |                                |
| Pre-mRS                                   | 2 (0.18%)                                    | Yes                            | 5 (0.212%)                                     | Yes                            |
| <b>Clinical presentation on admission</b> |                                              |                                |                                                |                                |
| NIHSS score on admission                  | 2 (0.18%)                                    | Yes                            | 5 (0.212%)                                     | Yes                            |
| ER glucose                                | 138 (12.40%)                                 | Yes                            | 407 (17.25%)                                   | Yes                            |
| ER SBP                                    | 4 (0.36%)                                    | Yes                            | 22 (0.93%)                                     | Yes                            |
| <b>Thrombolysis parameters</b>            |                                              |                                |                                                |                                |
| Onset to treatment time, OTT              | 0 (0.00%)                                    | No                             | 1 (0.042%)                                     | Yes                            |
| Door to needle time, DNT                  | 2 (0.18%)                                    | Yes                            | 17 (0.72%)                                     | Yes                            |
| TNK/rt-PA dose                            | 5 (0.45%)                                    | Yes                            | 13 (0.55%)                                     | No                             |
| Door to puncture time, DTP                | 7 (0.63%)                                    | Yes                            | 8 (0.34%)                                      | Yes                            |
| <b>Outcomes</b>                           |                                              |                                |                                                |                                |
| 24-hours NIHSS                            | 5 (0.45%)                                    | No                             | 36 (1.53%)                                     | No                             |
| 90-day mRS                                | 19 (1.71%)                                   | No                             | 152 (6.44%)                                    | No                             |
| 90-day mortality                          | 19 (1.71%)                                   | No                             | 152 (6.44%)                                    | No                             |

Supplementary Table 3. Matched baseline characteristics after propensity score matching in TNK and alteplase group

| Characteristics                           | Unmatched groups | After PSM                             |                      |
|-------------------------------------------|------------------|---------------------------------------|----------------------|
|                                           |                  | Standard Mean Difference <sup>b</sup> | P-value <sup>a</sup> |
| <b>Demographics</b>                       |                  |                                       |                      |
| Age, years, median (IQR)                  | 0.000            | -0.0335                               | 0.214                |
| Male, N, (%)                              | 0.176            | 0.0281                                | 0.509                |
| Pre-mRS, median (IQR)                     | 0.006            | NA                                    | 0.595                |
| mRS=0, %                                  |                  | -0.018                                |                      |
| mRS=1, %                                  |                  | 0.0076                                |                      |
| mRS=2, %                                  |                  | -0.0161                               |                      |
| mRS=3, %                                  |                  | 0.0455                                |                      |
| mRS=4, %                                  |                  | 0.0368                                |                      |
| Pre-mRS=0-1, N (%)                        | 0.110            | NA                                    | 0.66                 |
| <b>Risk factors, No. (%)</b>              |                  |                                       |                      |
| Smoking                                   | 0.000            | 0.007                                 | 0.869                |
| Hypertension                              | 0.228            | NA                                    | 0.239                |
| Diabetes mellitus                         | 0.000            | -0.0257                               | 0.549                |
| Dyslipidemia                              | 0.000            | -0.0693                               | 0.126                |
| Atrial fibrillation                       | 0.000            | 0.0099                                | 0.814                |
| <b>Previous history, No. (%)</b>          |                  |                                       |                      |
| Coronal heart disease                     | 0.218            | NA                                    | 0.439                |
| Heart failure                             | 0.015            | -0.0609                               | 0.205                |
| Ischemic stroke/TIA                       | 0.000            | -0.0282                               | 0.511                |
| <b>Concomitant medication, No. (%)</b>    |                  |                                       |                      |
| Antiplatelet drugs                        | 0.000            | 0.0184                                | 0.611                |
| Anticoagulant drugs                       | 0.358            | NA                                    | 0.008                |
| <b>Clinical presentation at emergency</b> |                  |                                       |                      |
| NIHSS score on admission, median (IQR)    | 0.334            | -0.0308                               | 0.427                |
| Glucose, mmol/L, median (IQR)             | 0.007            | -0.0114                               | 0.423                |
| Systolic blood pressure, median (IQR)     | 0.023            | -0.0355                               | 0.599                |
| Thrombectomy, N (%)                       | 0.008            | -0.0519                               | 0.238                |

<sup>a</sup> Univariate comparison between TNK and alteplase.  
<sup>b</sup> A standardized mean difference<0.2 indicated a successful balance between the groups

**Supplementary Table 4. Baseline characteristics of the Inner Mongolia center and the rest of the centers in the TNK and alteplase group**

| Characteristic                             | Inner Mongolia   | Other centers excluded inner Mongolia | P-value <sup>a</sup> | Inner Mongolia   | Other centers excluded inner Mongolia | P-value <sup>a</sup> |
|--------------------------------------------|------------------|---------------------------------------|----------------------|------------------|---------------------------------------|----------------------|
|                                            | TNK, N=489       | TNK, N=624                            |                      | Alteplase, N=57  | Alteplase, N=2303                     |                      |
| Age, yr, median (IQR)                      | 64 (58, 70.5)    | 67 (59, 75)                           | 0.0002               | 68 (61, 73)      | 68 (60, 76)                           | 0.581                |
| Male, N (%)                                | 306 (62.58%)     | 407 (65.22%)                          | 0.361                | 38 (66.67%)      | 1529 (66.39%)                         | 0.965                |
| Pre_mRS, median (IQR)                      | 0 (0, 0)         | 0 (0, 0)                              | 0.000                | 0 (0, 0)         | 0 (0, 0)                              | 0.026                |
| Pre-mRS=0-1, n/N (%)                       | 489 (100.00%)    | 579 (92.79%)                          | 0.000                | 57 (100%)        | 2178 (94.57%)                         | 0.071                |
| Smoking, N (%)                             | 6 (1.23%)        | 198 (31.73%)                          | 0.000                | 2 (3.51%)        | 808 (35.08%)                          | 0.000                |
|                                            |                  |                                       |                      |                  |                                       |                      |
| Hypertension, N (%)                        | 309 (63.19%)     | 393 (62.98%)                          | 0.943                | 44 (77.19%)      | 1494 (64.87%)                         | 0.054                |
| Diabetes mellitus, N (%)                   | 40 (8.18%)       | 161 (25.80%)                          | 0.000                | 4 (7.02%)        | 679 (29.48%)                          | 0.000                |
| Dyslipidemia, N (%)                        | 0 (0.00%)        | 57 (9.13%)                            | 0.000                | 0 (0.00%)        | 378 (16.41%)                          | 0.001                |
| Atrial fibrillation, N (%)                 | 9 (1.84%)        | 81 (12.98%)                           | 0.000                | 1 (1.75%)        | 341 (14.81%)                          | 0.006                |
| Coronal heart disease, N (%)               | 43 (8.79%)       | 75 (12.02%)                           | 0.083                | 6 (10.53%)       | 278 (12.07%)                          | 0.723                |
| Heart failure, N(%)                        | 1 (0.20%)        | 11 (1.76%)                            | 0.012                | 1 (1.75%)        | 53 (2.3%)                             | 0.785                |
| Ischemic stroke/TIA, N (%)                 | 0 (0.00%)        | 159 (25.48%)                          | 0.000                | 3 (5.26%)        | 459 (19.93%)                          | 0.006                |
|                                            |                  |                                       |                      |                  |                                       |                      |
| Antiplatelet drugs, N (%)                  | 5 (1.02%)        | 101 (16.19%)                          | 0.000                | 0 (0.00%)        | 427 (18.54%)                          | 0.000                |
| Anticoagulant drugs, N (%)                 | 2 (0.41%)        | 37 (5.93%)                            | 0.000                | 0 (0.00%)        | 69 (3%)                               | 0.185                |
|                                            |                  |                                       |                      |                  |                                       |                      |
| NIHSS score on admission, median (IQR)     | 5 (4, 6)         | 5 (3, 12)                             | 0.0968               | 6 (3.5, 8)       | 5 (3, 10)                             | 0.43                 |
| Thrombectomy, N (%)                        | 0 (0.00%)        | 93 (14.90%)                           | 0.000                | 0 (0.00%)        | 266 (11.55%)                          | 0.006                |
| Baseline glucose, mmol/L, median (IQR)     | 6.2 (5.4, 7.59)  | 6.8 (5.8, 8.77)                       | 0.000                | 5.9 (5.1, 8.6)   | 6.82 (5.6, 8.8)                       | 0.047                |
| Systolic BP, median (IQR)                  | 140 (130, 155)   | 150 (133.25, 162)                     | 0.000                | 150 (136, 153.5) | 146 (133, 162)                        | 0.323                |
|                                            |                  |                                       |                      |                  |                                       |                      |
| Door to needle time, min, median (IQR)     | 25 (20, 30)      | 35 (24, 50)                           | 0.000                | 38 (30, 63)      | 38 (27, 55)                           | 0.201                |
| Onset to treatment time, min, median (IQR) | 192 (143, 236.5) | 155 (110, 218)                        | 0.000                | 194 (135, 223.5) | 140 (101, 181)                        | 0.000                |

<sup>a</sup> Univariate comparison between TNK and alteplase.

BP=blood pressure; IQR=interquartile range; mRS=modified Rankin Scale; NIHSS=National Institutes of Health Stroke Scale; TNK=tenecteplase.

**Supplementary Table 5. Mediation analysis of DNT for the associations between intravenous thrombolysis drug and sICH**

| Mediators | Direct effect               |          | Indirect effect       |          | Proportion mediated |
|-----------|-----------------------------|----------|-----------------------|----------|---------------------|
|           | Effect size (95% CIs)       | <i>p</i> | Effect size (95% CIs) | <i>p</i> |                     |
| DNT       | -0.001659<br>(-0.009, 0.01) | 0.74     | -0.001<br>(-0.002, 0) | 0.64     | 0.35                |

**Supplementary Figure 1. Distribution of TNK Doses Administered During the Study Period**

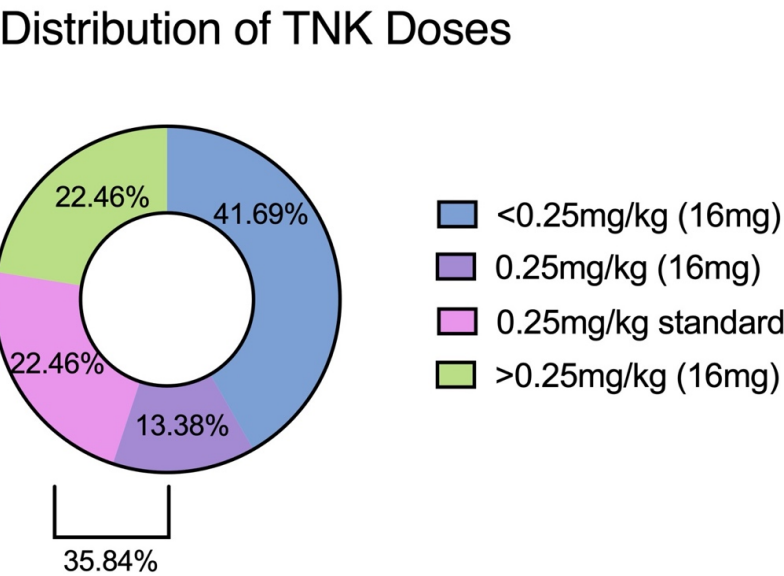

The figure presents the distribution of TNK doses administered to patients during the study period. A majority of centers used a fixed 16 mg vial (863 patients, 77.54%). Of these, the largest portion (41.69%) received less than 0.25mg/kg of TNK at the fixed 16mg dose. Additionally, 13.38% of patients received exactly 0.25mg/kg at 16mg while another 22.46% received 0.25mg/kg following the standard dosing method. The remaining 22.46% received more than 0.25mg/kg with the 16mg dose.

**Supplementary Figure 2.** Subgroup analyses of intravenous tenecteplase compared to intravenous alteplase **for the sICH (primary outcome)** in the propensity score matched cohort

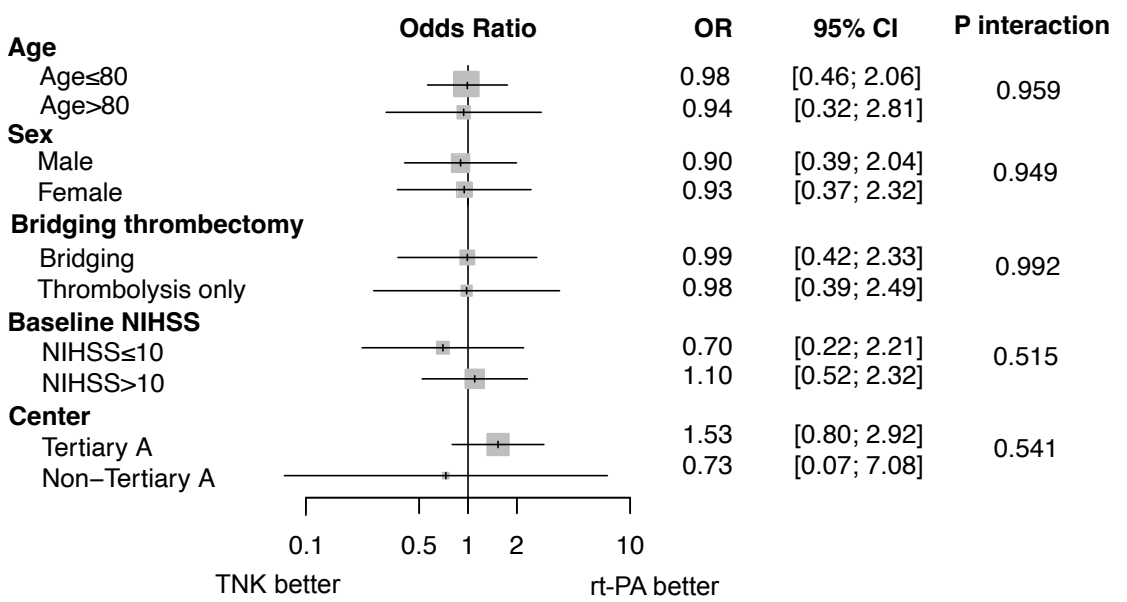

CI=confidence interval; OR=odds ratio; mRS=modified Rankin Scale
